# Supplementary material for: Improved electro-grafting of nitropyrene onto onion-like carbon via in situ electrochemical reduction and polymerization: tailoring redox energy density of the supercapacitor positive electrode
Source: Royal Society of Chemistry journal article supplement (doi:10.1039/c6ta08170c), 2016-12-12
Supplement: c6ta08170c1.pdf [file c6ta08170c1.pdf]

## Electronic Supporting Information

### **Improved electro-grafting of nitropyrene onto onion-like carbon via *in situ* electrochemical reduction and polymerization: Tailoring redox energy density of the supercapacitor positive electrode**

Bihag Anothumakkool<sup>1</sup>, Yuman Sayed-Ahmad-Baraza<sup>1</sup>, Chris Ewels<sup>1</sup>, Pierre-Louis Taberna<sup>2</sup>,  
Barbara Daffos<sup>2</sup>, Patrice Simon<sup>2</sup>, Thierry Brousse\*<sup>1</sup> and Joel Gaubicher<sup>1\*</sup>

1-Institut des Materiaux Jean Rouxel (IMN), University of Nantes, CNRS, 2, rue de Houssiniere-  
B.P. 32229-44322 Nantes cedex 3-France

2-Universite Paul Sabatier, Cirmat/Lcmie, 31062 Toulouse cedex 9 – France,

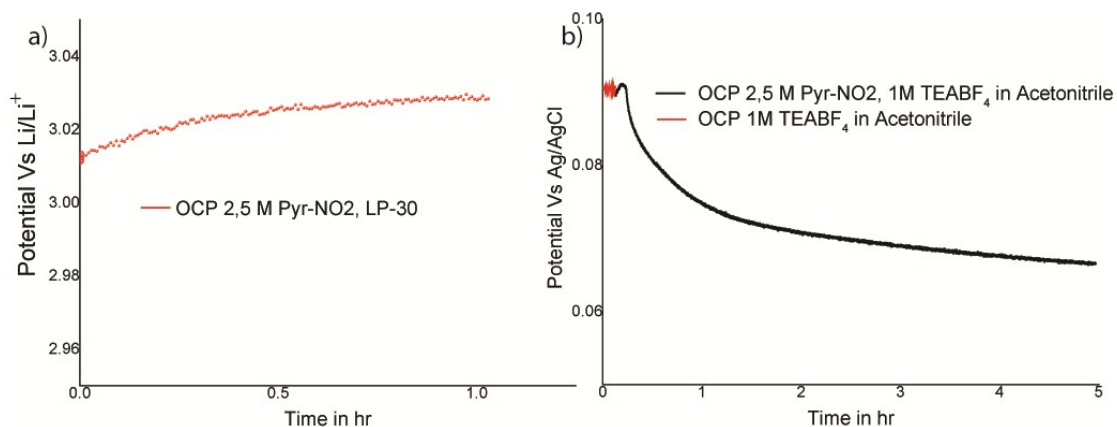

Figure S1: Open circuit potential (OCP) of YP-80 electrode in LP-30 and b) OCP of OLC electrode in 1M TEABF<sub>4</sub>/Acetonitrile and further after the introduction of 2mM Pyr-NO<sub>2</sub>.

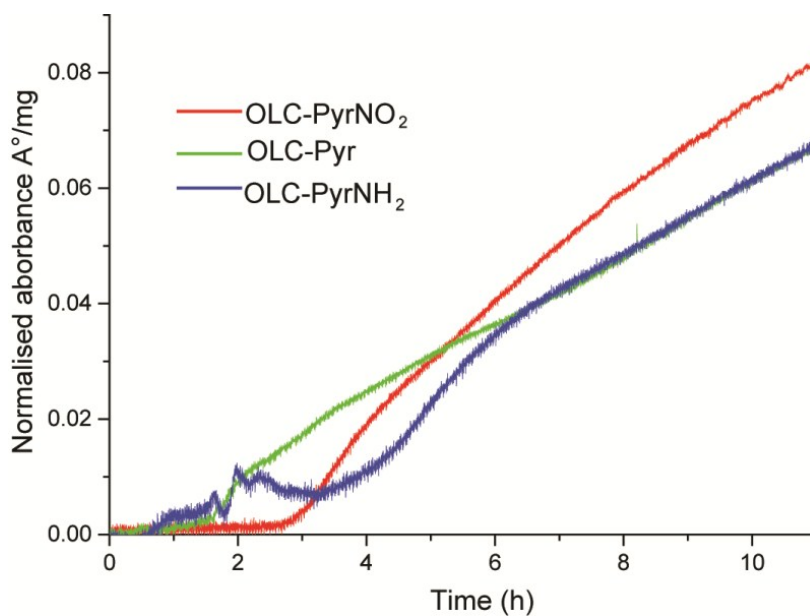

Figure S2: Adsorption of Pyrene and derivatives onto carbon onion; in all cases the concentration was 0.25 mM in LP-30

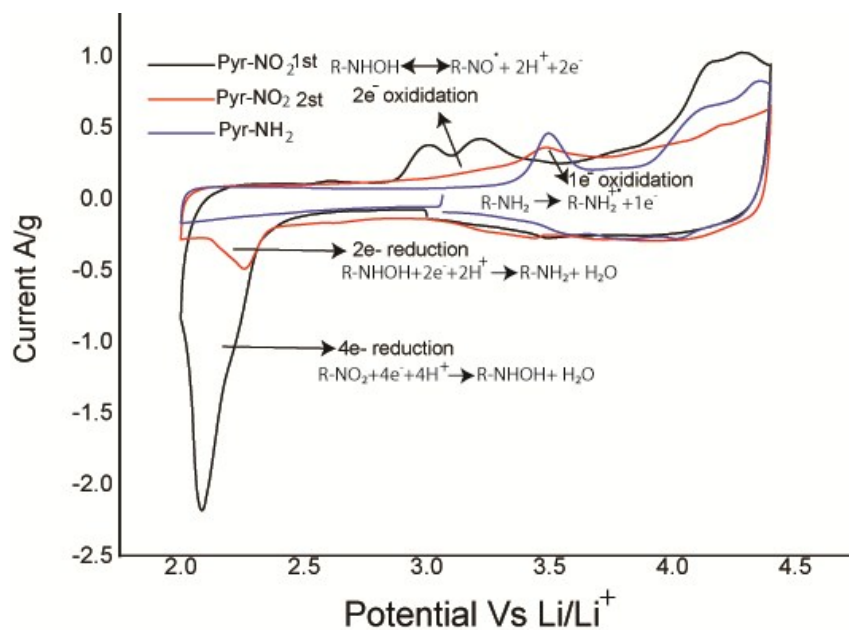

Figure S3: Initial CV profile at a scan rate of 5 mV/s in LP-30 containing 2 mM Pyr-NO<sub>2</sub> and Pyr-NH<sub>2</sub>. Different electrochemical process and their corresponding peaks are indicated in the inset of figure.

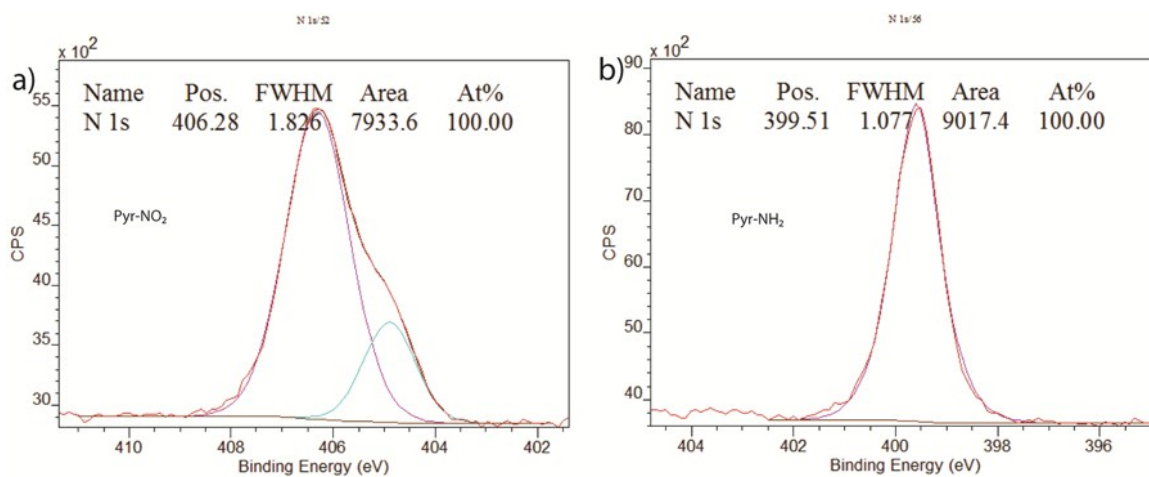

Figure S4: N1S XPS spectra of a) 1-nitropyrene and b) 1-aminopyrene

Table S1. N1S core level XPS details of OLC/PPyrNO2

| Peak name        | Position | Full width Half maximum (FWHM) | % area |
|------------------|----------|--------------------------------|--------|
| -NH <sub>2</sub> | 400.4    | 2.52                           | 79.8   |
| -NHOH            | 402.2    | 2.55                           | 20.2   |

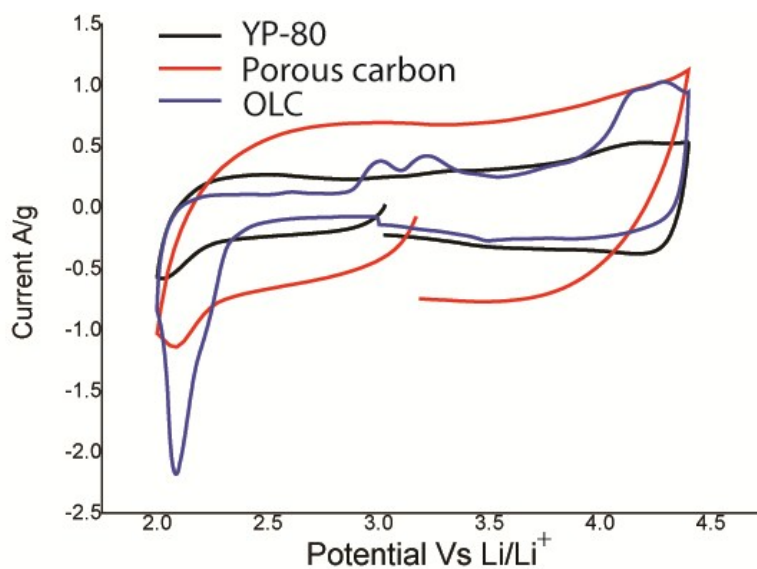

Figure S5: CV profile of OLC in comparison to two different commercial porous carbon electrode at a scan rate of 5 mV/s in LP-30 containing 2 mM Pyr-NO<sub>2</sub>.

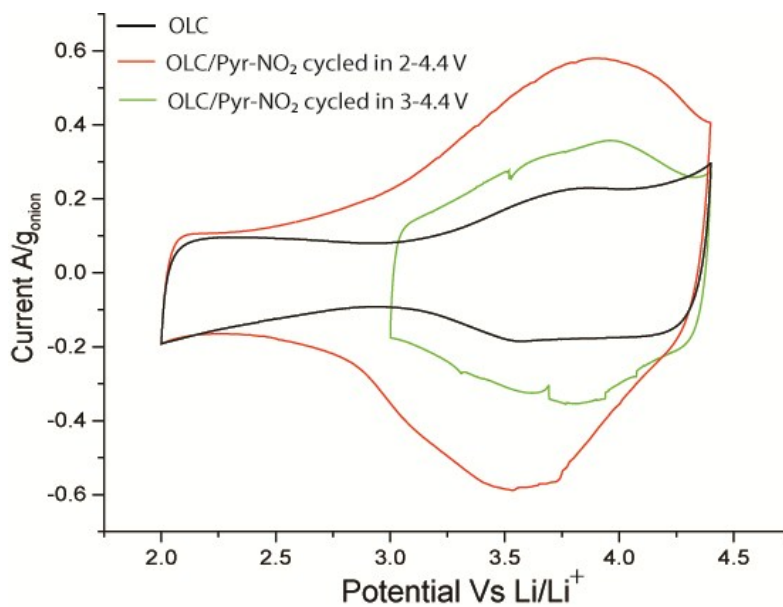

Figure S6: CV profile at a scan rate of 5 mV/s in LP-30 containing 2 mM Pyr-NO<sub>2</sub> derivative after electropolymerisation for 800 cycles in 2-4.4 V (red) and 3-4.4 V (green) window in comparison to bare carbon onion (black).

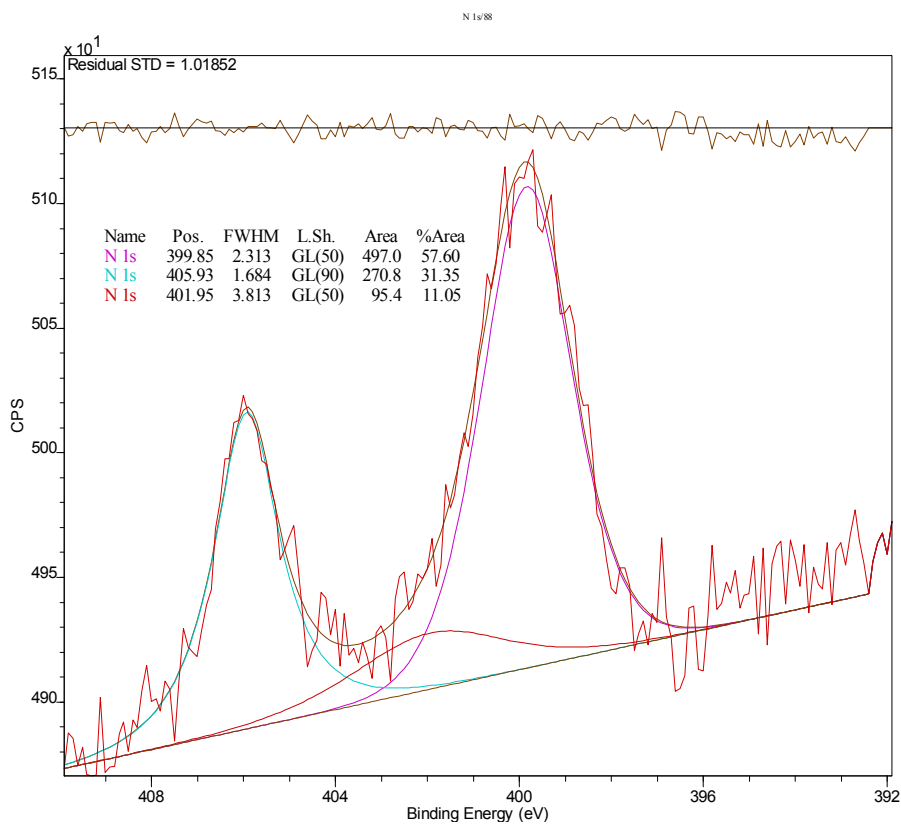

Figure S7: N1s core XPS spectra of PPy-NO<sub>2</sub>-coated OLC after cycling in a potential window of 2-4.4 V.

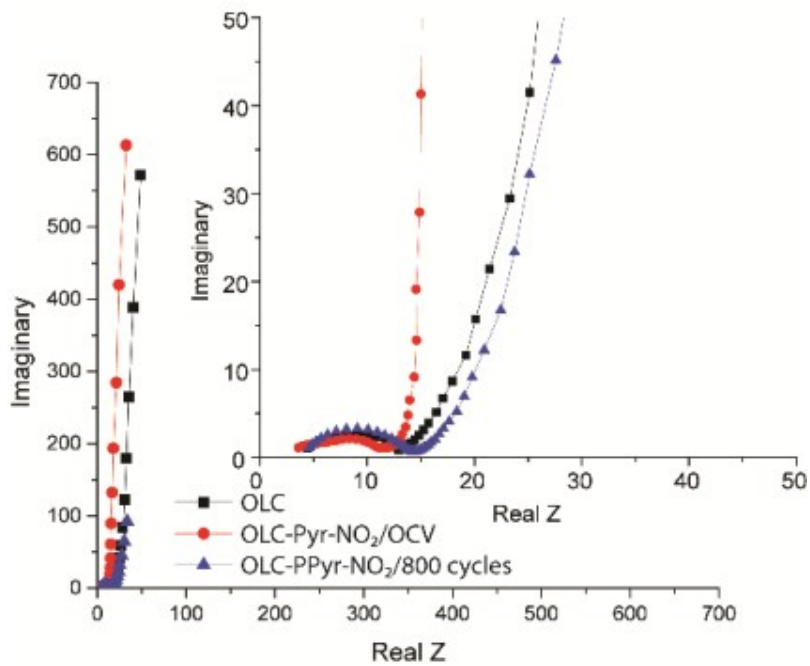

Figure S8: Nyquist plot from the EIS spectra

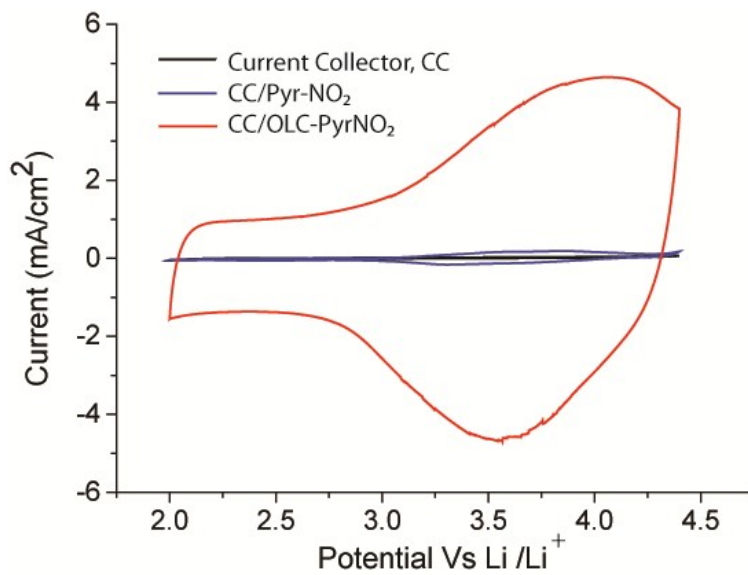

Figure S9: Areal current Vs voltage profile of OLC-PyrNO<sub>2</sub> in comparison to PyrNO<sub>2</sub> deposited onto current collector and pure current collector.

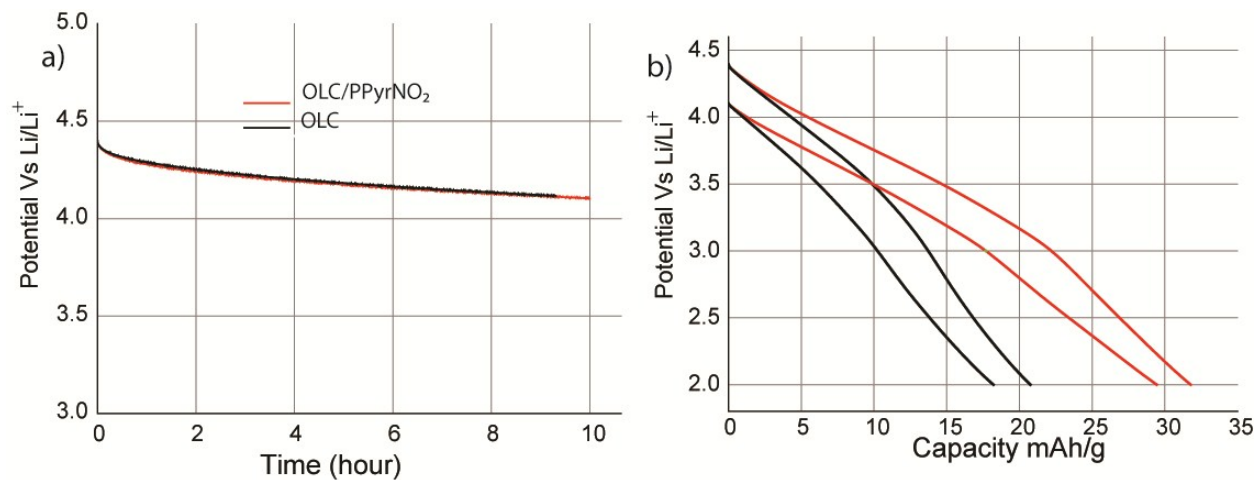

Figure S10: a) Plot of cell potential vs. relaxation time after charging to 4.4 V vs. Li<sup>+</sup>/Li and b) change in the capacity due to the leakage loss during the relaxation time for 10 hour.
